# Supplementary material for: Alkaline-earth metal (Mg) polynitrides at high pressure as possible high-energy materials
Source: Royal Society of Chemistry journal article supplement (doi:10.1039/c6cp08771j), 2017-01-01
Supplement: c6cp08771j1.pdf [file c6cp08771j1.pdf]

# Supporting Information

## Alkaline-Earth Metal (Mg) Polynitrides at High Pressure as a Possible High-Energy Material

*Shuli Wei, Da Li, Zhao Liu, Xin Li, Fubo Tian, Defang Duan, Bingbing Liu and Tian Cui\**

*State Key Laboratory of Superhard Materials, College of Physics, Jilin University, Changchun,*

*130012, P. R. China. \*Email: cuitian@jlu.edu.cn*

### Index

|                                                                                                              |    |
|--------------------------------------------------------------------------------------------------------------|----|
| 1. The stable high-pressure structures of $\text{Mg}_2\text{N}_3$ .....                                      | 2  |
| 2. Computational details.....                                                                                | 3  |
| 3. The calculated phonon dispersion for all predicted Mg-N compounds.....                                    | 4  |
| 4. Structural parameters of all considered structures for Mg-N. ....                                         | 8  |
| 5. The discussion about the stabilities of predicted $P$ -1- $\text{MgN}_3$ and $P$ -1- $\text{MgN}_4$ ..... | 10 |

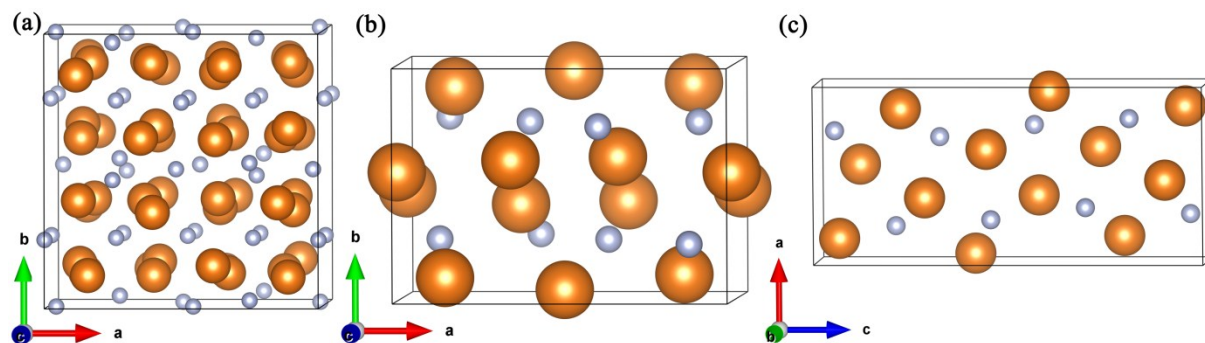

**Figure. S1.** Structures of stable  $\text{Mg}_2\text{N}_3$  crystals: (a)  $Ia-3$ -phase at ambient pressure, (b)  $Pbcn$ -phase at 20 GPa and (c)  $Pnma$ -phase at 40 GPa.

## Computational Details

Our structural prediction approach is based on a global minimization of free energy surfaces merging ab initio total-energy calculations with CALYPSO (Crystal structure AnaLYsis by Particle Swarm Optimization) methodology as implemented in the CALYPSO code. In the first step, random structures with certain symmetry are constructed in which atomic coordinates are generated by the crystallographic symmetry operations. Local optimizations using the VASP code were done with the conjugate gradients method and stopped when enthalpy changes became smaller than  $1 \times 10^{-5}$  eV per cell. After processing the first generation structures, 60% of them with lower enthalpies are selected to construct the next generation structures by PSO (Particle Swarm Optimization). 40% of the structures in the new generation are randomly generated. A structure fingerprinting technique of bond characterization matrix is applied to the generated structures, so that identical structures are strictly forbidden. These procedures significantly enhance the diversity of the structures, which is crucial for structural global search efficiency. In most cases, structural searching simulations for each calculation were stopped after generating 1000 ~ 1200 structures (e.g., about 20 ~ 30 generations).

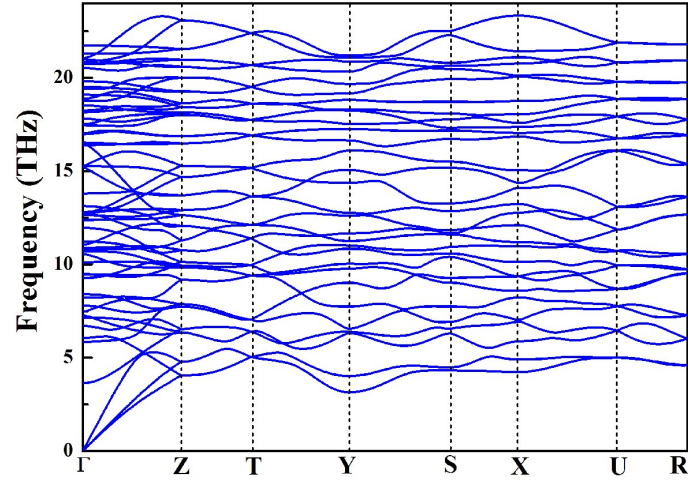

**Figure. S2.** Phonon dispersion curves of *Pbcn*-Mg<sub>3</sub>N<sub>2</sub> phase at 20 GPa.

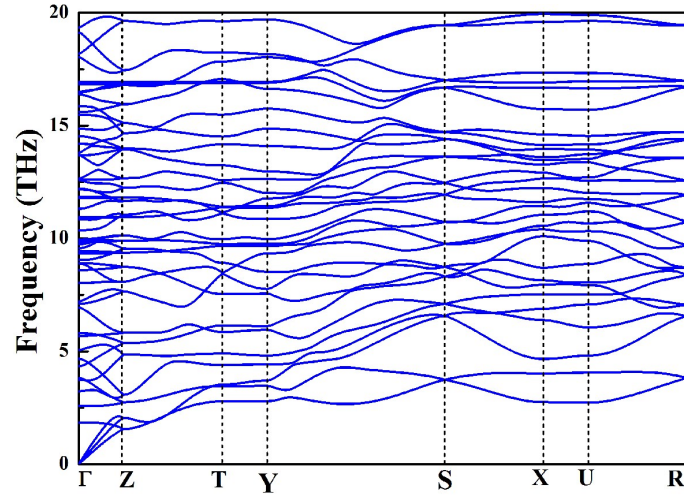

**Figure. S3.** Phonon dispersion curves of *Pmma*-Mg<sub>3</sub>N<sub>2</sub> phase at 40 GPa.

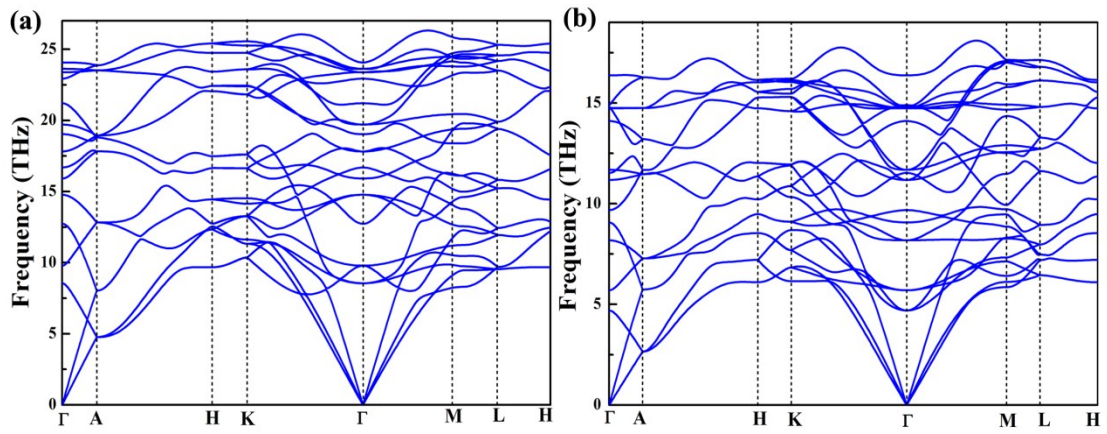

**Figure. S4.** Phonon dispersion curves of *P6<sub>3</sub>/mmc*-MgN phase at 80 GPa (a) and 0 GPa (b).

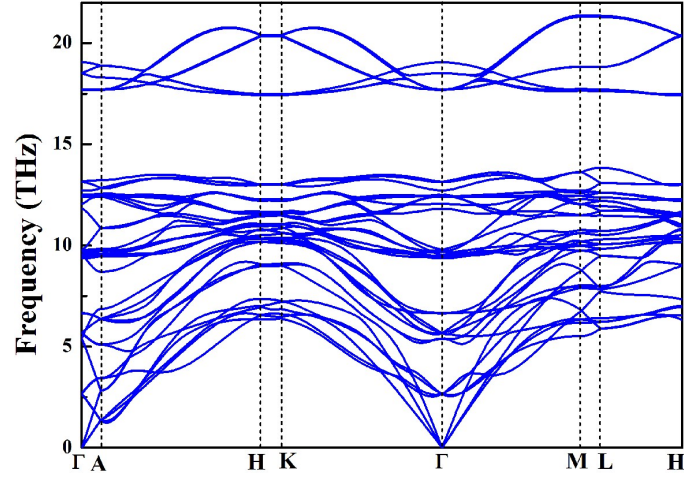

**Figure. S5.** Phonon dispersion curves of  $R\text{-}3m\text{-Mg}_2\text{N}_3$  phase at 10 GPa.

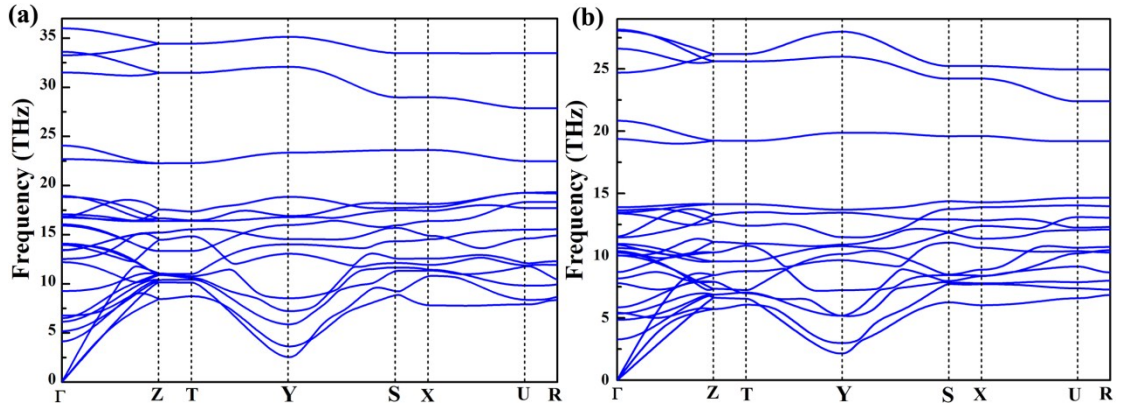

**Figure. S6.** Phonon dispersion curves of  $Imm2\text{-Mg}_2\text{N}_3$  phase at 40 GPa (a) and 0 GPa (b).

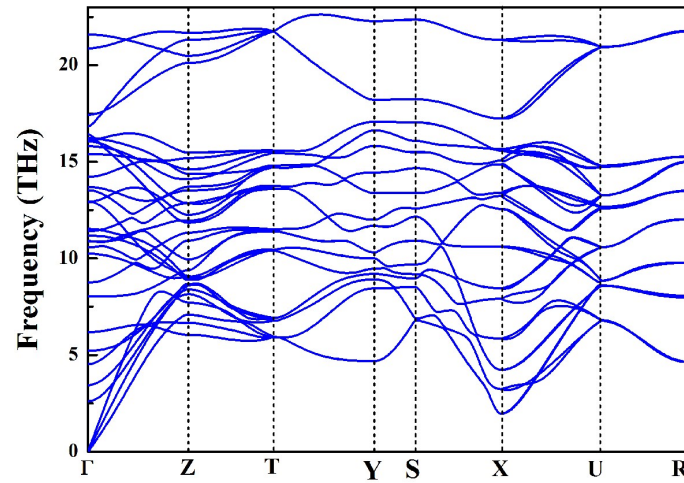

**Figure. S7.** Phonon dispersion curves of  $Cmcm\text{-MgN}_2$  phase at 10 GPa.



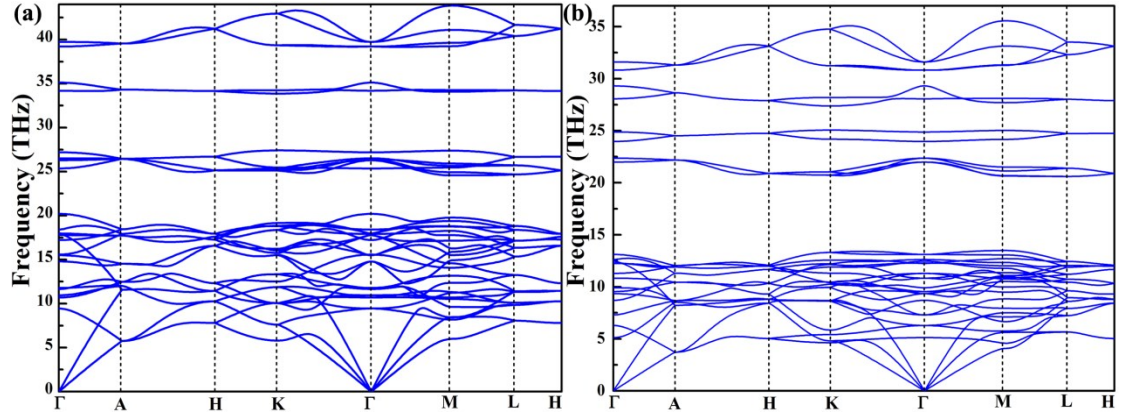

**Figure. S8.** Phonon dispersion curves of  $P6_3/mcm$ - $MgN_2$  phase at 60 GPa (a) and 0 GPa (b).

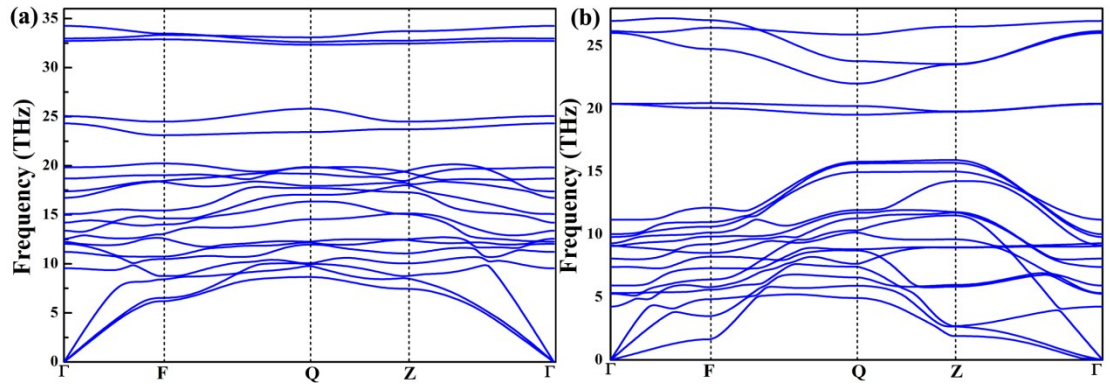

**Figure. S9.** Phonon dispersion curves of  $P-1$ - $MgN_3$  phase at 80 GPa (a) and 0 GPa (b).

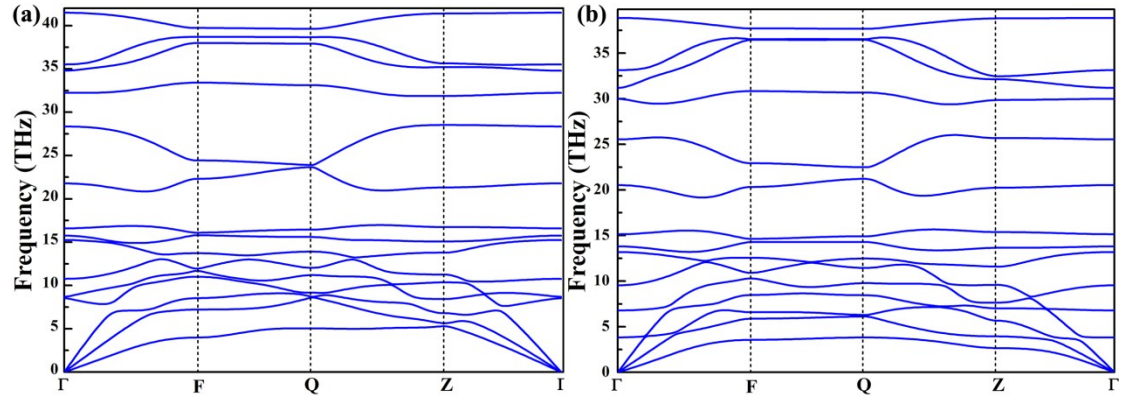

**Figure. S10.** Phonon dispersion curves of  $P-1$ - $MgN_4$  phase at 10 GPa.

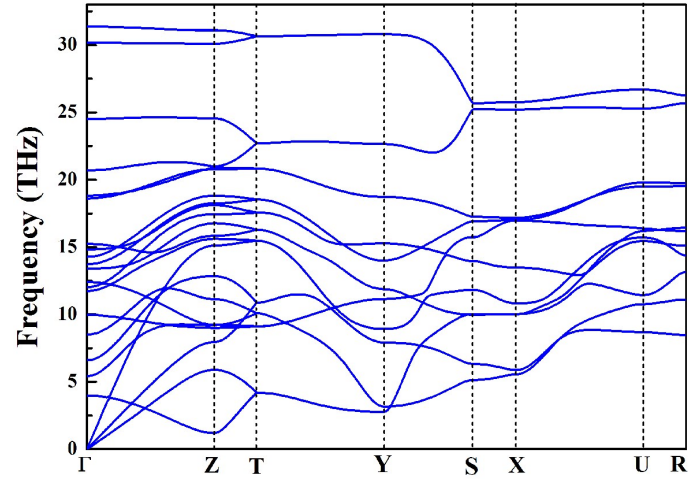

**Figure. S11.** Phonon dispersion curves of  $Cmmm$ - $MgN_4$  phase at 60 GPa.

**Table S1.** Structural parameters of all considered structures for Mg-N.

| Str. And S.G.                                                        | Lattice parameters (Å, °)                                                                         | Atomic coordinates (fractional)                                                                                                        | Sites                                                              |
|----------------------------------------------------------------------|---------------------------------------------------------------------------------------------------|----------------------------------------------------------------------------------------------------------------------------------------|--------------------------------------------------------------------|
| <b><i>Ia-3</i>-Mg<sub>3</sub>N<sub>2</sub></b><br><b>P = 0 GPa</b>   | a = 10.010<br>b = 10.010<br>c = 10.010                                                            | N1 (0.969, 0.0, 0.25)<br>N2 (0.25, 0.25, 0.25)<br>Mg (0.389, 0.153, 0.382)                                                             | 24 <i>d</i><br>8 <i>b</i><br>48 <i>e</i>                           |
| <b><i>Pbcn</i>-Mg<sub>3</sub>N<sub>2</sub></b><br><b>P = 30 GPa</b>  | a = 7.363<br>b = 5.148<br>c = 5.249                                                               | N (0.115, 0.253, 0.532)<br>Mg1 (0.652, 0.606, 0.609)<br>Mg2 (0.5, 0.048, 0.75)                                                         | 8 <i>d</i><br>8 <i>d</i><br>4 <i>c</i>                             |
| <b><i>Pnma</i>-Mg<sub>3</sub>N<sub>2</sub></b><br><b>P = 40 GPa</b>  | a = 5.554<br>b = 3.090<br>c = 12.191                                                              | N1 (0.187, 0.25, 0.193)<br>N2 (0.245, 0.75, 0.450)<br>Mg1 (0.360, 0.25, 0.561)<br>Mg2 (0.533, 0.25, 0.103)<br>Mg3 (0.632, 0.25, 0.720) | 4 <i>c</i><br>4 <i>c</i><br>4 <i>c</i><br>4 <i>c</i><br>4 <i>c</i> |
| <b><i>P6<sub>3</sub>/mmc</i>-MgN</b><br><b>P = 0 GPa</b>             | a = 3.326<br>c = 8.604<br>$\gamma = 120$                                                          | N1 (0.667, 0.333, 0.354)<br>Mg1 (0.0, 0.0, 0.0)<br>Mg2 (0.667, 0.333, 0.57)                                                            | 4 <i>f</i><br>2 <i>a</i><br>2 <i>c</i>                             |
| <b><i>R-3m</i>-Mg<sub>2</sub>N<sub>3</sub></b><br><b>P = 20 GPa</b>  | a = 2.952<br>c = 18.983<br>$\gamma = 120$                                                         | N1 (0.667, 0.333, 0.865)<br>N2 (0.333, 0.667, 0.667)<br>Mg (0.0, 0.0, 0.725)                                                           | 6 <i>c</i><br>3 <i>a</i><br>6 <i>c</i>                             |
| <b><i>Imm2</i>-Mg<sub>2</sub>N<sub>3</sub></b><br><b>P = 0 GPa</b>   | a = 9.744<br>b = 2.985<br>c = 3.307                                                               | N1 (0.372, 0.0, 0.547)<br>N2 (0.5, 0.0, 0.337)<br>Mg (0.648, 0.5, 0.034)                                                               | 4 <i>c</i><br>2 <i>b</i><br>4 <i>c</i>                             |
| <b><i>Cmcm</i>-MgN<sub>2</sub></b><br><b>P = 0 GPa</b>               | a = 3.999<br>b = 8.574<br>c = 3.449                                                               | N1 (0.842, 0.893, 0.75)<br>Mg (0.0, 0.368, 0.25)                                                                                       | 8 <i>g</i><br>4 <i>c</i>                                           |
| <b><i>P6<sub>3</sub>/mcm</i>-MgN<sub>2</sub></b><br><b>P = 0 GPa</b> | a = 4.825<br>c = 5.527<br>$\gamma = 120$                                                          | N1 (0.0, 0.280, 0.75)<br>N2 (0.0, 0.0, 0.75)<br>Mg (0.667, 0.333, 0.5)                                                                 | 6 <i>g</i><br>2 <i>a</i><br>4 <i>d</i>                             |
| <b><i>P-1</i>-MgN<sub>3</sub></b><br><b>P = 0 GPa</b>                | a = 5.267<br>b = 5.271<br>c = 3.025<br>$\alpha=85.72^\circ \beta=86.01^\circ \gamma=60.13^\circ$  | N1 (0.826, 0.303, 0.016)<br>N2 (0.697, 0.131, 0.986)<br>N3 (0.870, 0.828, 0.967)<br>Mg (0.666, 0.667, 0.499)                           | 2 <i>i</i><br>2 <i>i</i><br>2 <i>i</i><br>2 <i>i</i>               |
| <b><i>P-1</i>-MgN<sub>4</sub></b><br><b>P = 0 GPa</b>                | a = 3.218<br>b = 3.860<br>c = 4.191<br>$\alpha=101.20^\circ \beta=84.05^\circ \gamma=69.99^\circ$ | N1 (0.419, 0.982, 0.145)<br>N2 (0.561, 0.373, 0.844)<br>Mg (0.0, 0.0, 0.5)                                                             | 2 <i>i</i><br>2 <i>i</i><br>1 <i>g</i>                             |
| <b><i>Cmmm</i>-MgN<sub>4</sub></b>                                   | a = 7.523                                                                                         | N (0.332, 0.316, 0.5)                                                                                                                  | 8 <i>g</i>                                                         |



|                  |                        |                    |    |
|------------------|------------------------|--------------------|----|
| <b>P =60 GPa</b> | b = 3.589<br>c = 2.520 | Mg (0.0, 0.5, 0.0) | 2b |
|------------------|------------------------|--------------------|----|

**Table S1.** Calculated Bader charges for *Imm2*-Mg<sub>2</sub>N<sub>3</sub>, *P6<sub>3</sub>/mcm*-MgN<sub>2</sub>, *P*-1-MgN<sub>3</sub> and *P*-1-MgN<sub>4</sub>, respectively.

| Str.                                        | Atom | N | Charge value(e) | δ(e)  |
|---------------------------------------------|------|---|-----------------|-------|
| <i>P6<sub>3</sub>/mmc</i> - MgN             | Mg1  | 2 | 0.38            | -1.62 |
|                                             | Mg2  | 2 | 0.39            | -1.61 |
|                                             | N1   | 2 | 6.67            | 1.67  |
|                                             | N2   | 2 | 6.56            | 1.56  |
| <i>Imm2</i> -Mg <sub>2</sub> N <sub>3</sub> | Mg   | 4 | 0.40            | -1.60 |
|                                             | N1   | 4 | 6.31            | 1.31  |
|                                             | N2   | 2 | 5.58            | 0.58  |
| <i>P6<sub>3</sub>/mcm</i> -MgN <sub>2</sub> | Mg   | 4 | 0.41            | -1.59 |
|                                             | N1   | 2 | 4.97            | -0.03 |
|                                             | N2   | 6 | 6.07            | 1.07  |
| <i>P</i> -1-MgN <sub>3</sub>                | Mg   | 2 | 0.40            | -1.60 |
|                                             | N1   | 2 | 5.55            | 0.55  |
|                                             | N2   | 2 | 5.53            | 0.53  |
|                                             | N3   | 2 | 5.52            | 0.52  |
| <i>P</i> -1-MgN <sub>4</sub>                | Mg   | 1 | 0.37            | -1.62 |
|                                             | N1   | 2 | 5.33            | 0.33  |
|                                             | N2   | 2 | 5.48            | 0.48  |

## The discussion about the stabilities of predicted $P$ -1-MgN<sub>3</sub> and $P$ -1-MgN<sub>4</sub>

The accuracy of searching crystal structure results by CALYPSO is lower than that of structural optimization results of DFT. To further analyze the structures with higher accuracy, we select a number of structures with lower enthalpies and perform structural optimization using density functional theory within the generalized gradient approximation as implemented in the VASP code. We have discussed the stabilities of predicted magnesium polynitrides by comparing between CALYPSO crystal structure searching results and calculation results of DFT in the revised paper (see the Supporting Information, Fig. S1)). The phonon band dispersion for the  $P$ -1-MgN<sub>3</sub> predicted at 100GPa and the  $P$ -1-MgN<sub>4</sub> predicted at 20GPa shows the stabilities of predicted magnesium polynitrides. To determine the transition pressure, the enthalpy curves of the predicted structures relative to the  $P$ -1-MgN<sub>3</sub> and  $P$ -1-MgN<sub>4</sub> have been plotted in Fig. 2. Clearly, the searching structure at special pressure point is still stable in the neighboring pressure range after structural optimization.

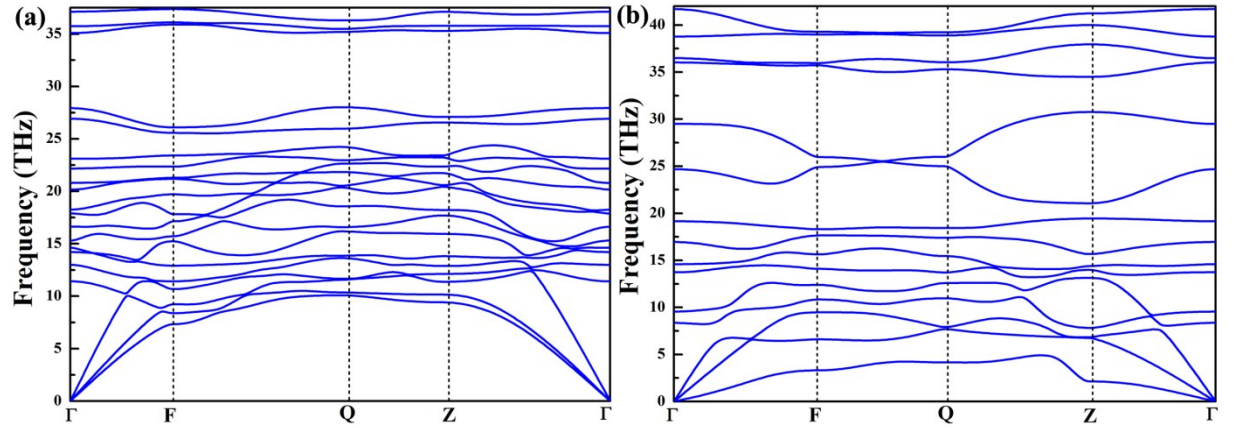

**Figure. S12.** Phonon dispersion curves of  $P$ -1-MgN<sub>3</sub> phase predicted at 100GPa and the  $P$ -1-MgN<sub>4</sub> phase predicted at 20GPa.

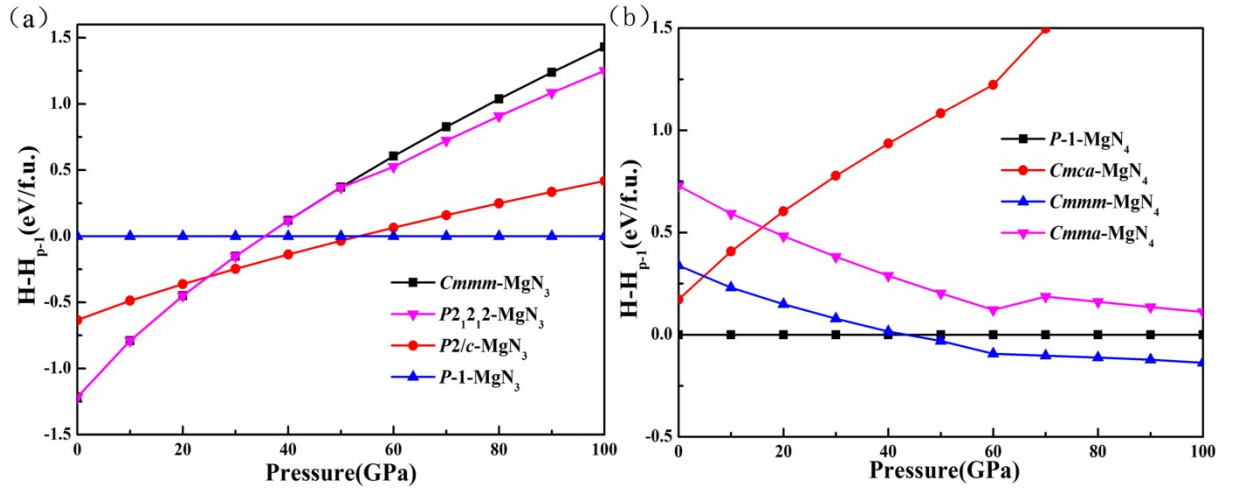

**Figure. S13.** (a) Enthalpy of the  $Cmmm-MgN_3$ ,  $P2_12_1-MgN_3$  and  $P2/c-MgN_3$  phases relative to  $P-1-MgN_3$  with pressure. (b) Enthalpy of the  $Cmca-MgN_4$ ,  $Cmmm-MgN_4$ , and  $Cmma-MgN_4$  phases relative to  $P-1-MgN_3$  with pressure.
